# Supplementary material for: Nanopore Discrimination of Coagulation Biomarker Derivatives and Characterization of a Post-Translational Modification
Source: PubMed Central journal article supplement (PMC9951287; doi:10.1021/acscentsci.2c01256), 2023-02-03
Supplement: oc2c01256_si_001.pdf [file oc2c01256_si_001.pdf]

Supporting Information for

## **Nanopore discrimination of coagulation biomarker derivatives and characterization of a post-translational modification**

Aïcha Stierlen<sup>1</sup>, Sandra J. Greive<sup>2</sup>, Laurent Bacri<sup>3</sup>, Philippe Manivet<sup>4,5</sup>, Benjamin Cressiot<sup>1\*</sup>, Juan Pelta<sup>1,3\*</sup>

1 LAMBE, CNRS, CY Cergy Paris Université, 95000, Cergy, France

2 DreamPore S.A.S., 33 Boulevard du Port 95000, Cergy, France

3 LAMBE, CNRS, Univ Evry, Université Paris-Saclay, 91025, Evry-Courcouronnes, France

4 Centre de Ressources Biologiques Biobank Lariboisière (BB-0033-00064), DMU BioGem, AP-HP, France

5 Université Paris Cité, Inserm, NeuroDiderot, F-75019, Paris, France

\* Corresponding authors: [benjamin.cressiot@cyu.fr](mailto:benjamin.cressiot@cyu.fr); [juan.pelta@univ-evry.fr](mailto:juan.pelta@univ-evry.fr)

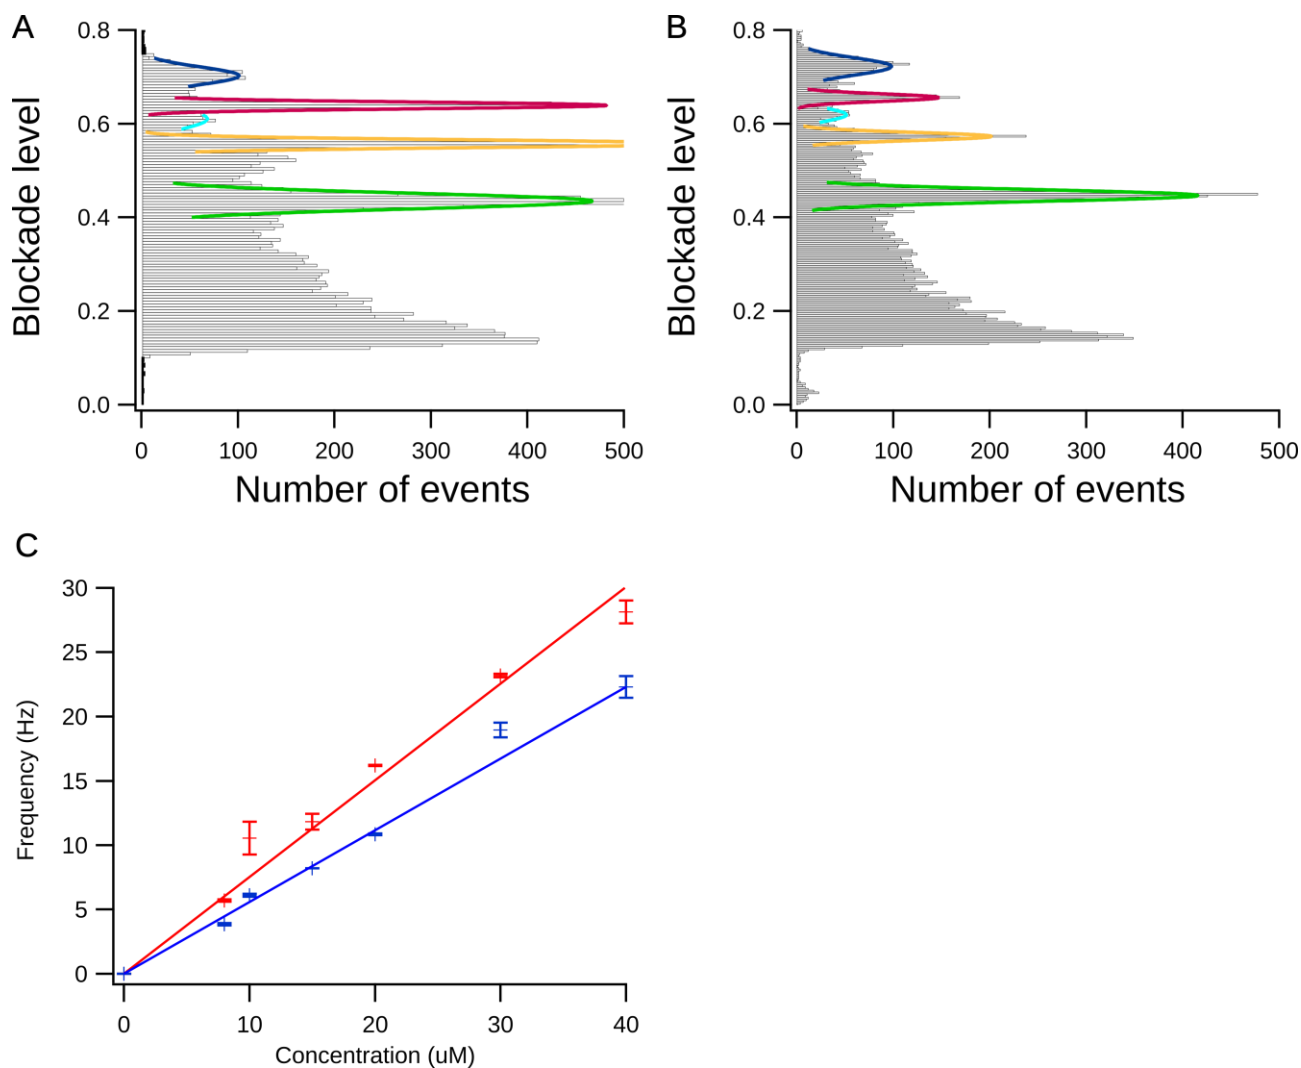

**Figure S1: Detection of FPA and FPA-P at different concentrations.** A and B) Histograms of the normalized blockade level against number of events for mixtures of FPA (red), FPA-P (populations: P1, blue; and P2, cyan), FPA-6 (yellow) and FPA-3 (green). Colored lines are fits of Gaussian functions to the data defining the most probable blockade level. A) Histogram of an equimolar mixture at 10  $\mu\text{M}$  (FPA:FPA-P 1:1) where the average and standard deviation of three fits to the data from 6221 events determined blockade levels for FPA  $0.65 \pm 0.01$  (red), FPA-P1  $0.71 \pm 0.01$  (blue), FPA-P2  $0.62 \pm 0.01$  (cyan), FPA-3  $0.57 \pm 0.01$  (yellow) and FPA-6  $0.44 \pm 0.01$  (green). B) Histogram for an equimolar mix of each peptide at 2.5  $\mu\text{M}$  except for FPA-P which was at 20  $\mu\text{M}$  (FPA:FPA-P 1:8). The average and standard deviation for the most probable blockade level, from three fits to the data from 20687 events, determined blockade levels of FPA  $0.66 \pm 0.01$  (red), FPA-P1  $0.72 \pm 0.02$  (blue), FPA-P2  $0.62 \pm 0.01$  (cyan), FPA-3  $0.57 \pm 0.01$  (yellow) and FPA-6  $0.45 \pm 0.01$  (green). C) Plot of frequency vs concentration for FPA (red) and FPA-P (blue). Lines are linear fits to the data to generate a concentration curve.
